# Supplementary material for: Characteristics and predicting factors of Corona Virus Disease-2019 (COVID-19) among healthcare providers in a developing country
Source: PubMed Central journal article supplement (PMC7817002; doi:10.1371/journal.pone.0245672), 2021-01-20
Supplement: pone.0245672.s001.pdf [file pone.0245672.s001.pdf]

# Questionnaire for Healthcare Providers about COVID-19

## استبيان عن كوفيد-19 موجه لمقدمي الخدمة الصحية

This survey is directed to EGYPTIAN healthcare workers to explore the needed measures for better protection from COVID-19 spread among healthcare providers. Your accurate input will be of great help. Thank you for your time. This is designed for research purposes only by a group of experts and academic researchers from different Egyptian universities . Confidentiality of data is guaranteed. By submitting your response, you consented the participation in the study

شكرا لموافقتك على المشاركة في هذا الاستبيان الذي يهدف لمنع الاصابات بمرض الكوفيد 19 بين افراد الفريق الصحي وتحقيق حماية افضل لهم من العدوى اثناء العمل. تم اعداد الاستبيان بواسطة فريق من الخبراء والباحثين في الجامعات المصرية المختلفة لغرض البحث العلمي فقط ولا يتم استخدام البيانات المذكورة في اغراض اخرى. ملئ الاستبيان هو موافقة منك على المشاركة في هذه الدراسة

\* Required

1. Do you work in Egypt? هل تعمل داخل جمهورية مصر العربية؟ \*

Mark only one oval.

Yes نعم

No لا

Personal and work related characteristics خصائص شخصية وخصائص طبيعة العمل

2. Age السن

\_\_\_\_\_

3. Gender النوع \*

Mark only one oval.

Male ذكر

Female انثى

4. For females healthcare workers فقط للزميلات

Mark only one oval per row.

|                                  | Yes نعم               | No لا                 |
|----------------------------------|-----------------------|-----------------------|
| Pregnancy هل يوجد حمل            | <input type="radio"/> | <input type="radio"/> |
| Lactation هل انت في فترة الرضاعة | <input type="radio"/> | <input type="radio"/> |

## 5. \* هل تعاني من اى من الامراض الاتية-اختر كل ما يناسب حالتك - Comorbid conditions

Check all that apply.

- ارتفاع ضغط الدم Hypertension
- مرض السكرى Diabetes mellitus
- امراض قلب مزمنة Heart disease
- امراض بالجهاز التنفسي Lung diseases
- امراض الكلى Renal diseases
- امراض مناعة الذاتية Autoimmune diseases
- اتلقى علاج بالكورتيزون On steroid therapy
- اتلقى علاج مثبط للمناعة On immunosuppressive drugs
- امراض نقص/خلل الجهاز المناعي Immunosuppressive disorders
- لا يوجد None
- اخرى Other

## 6. في حالة وجود امراض اخرى لم تذكر في القائمة السابقة...من فضلك أذكرها Other co-comorbidity

---

---

---

---

---

---

## 7. Governorate المحافظة \*

Mark only one oval.

- Alexandria Governorate الاسكندرية
- Aswan Governorate اسوان
- Asyut Governorate اسيوط
- Beheira Governorate البحيرة
- Beni Suef Governorate بني سويف
- Cairo Governorate القاهرة
- Dakahlia Governorate الدقهلية
- Damietta Governorate دمياط
- Faiyum Governorate الفيوم
- Gharbia Governorate الغربية
- Giza Governorate الجيزة
- Ismailia Governorate الاسماعيلية
- Kafr El Sheikh Governorate كفر الشيخ
- Luxor Governorate الاقصر
- Matruh Governorate مطروح
- Minya Governorate المنيا
- Monufia Governorate المنوفية
- New Valley Governorate الوادي الجديد
- North Sinai Governorate جنوب سيناء
- Port Said Governorate بور سعيد
- Qalyubia Governorate القليوبية
- Qena Governorate قنا
- Red Sea Governorate البحر الاحمر
- Sharqia Governorate الشرقية
- Sohag Governorate سوهاج
- South Sinai Governorate شمال سيناء
- Suez Governorate السويس

## 8. Work experience: عدد سنوات الخبرة \*

Mark only one oval.

- < 5 years أقل من خمس سنوات
- 6-10 years
- 11- 15 years
- 16-20 years
- > 20 years أكثر من 20 سنة

## 9. Job الوظيفة \*

Mark only one oval.

- Physician طبيب
- Pharmacist صيدلي
- Dentist طبيب اسنان
- Physiotherapist اخصائي علاج طبيعي
- Nurse تمريض
- Technician كيميائي / فني
- Worker عامل
- Others تخصصات اخرى

## 10. Specialty التخصص (للاطباء البشريين والفنيين والعمال)

---

## 11. Other job في حالة وجود وظيفة اخرى لم تذكر في القائمة السابقة... من فضلك أذكرها

---



---



---



---

## 12. Your Healthcare facility type (select primary location) حدد مكان عملك الاصلى \*

Mark only one oval.

- Hospital مستشفى
- Primary health center مركز رعاية صحية اولية
- Outpatient clinic عيادة خارجية
- Rehabilitation center مركز تأهيل
- Quarantine الحجر الصحي
- Oncology centre مركز اورام
- Other: \_\_\_\_\_

## 13. Other workplace في حالة وجود مكان عمل آخر لم يذكر في القائمة السابقة... من فضلك أذكره

---



---



---



---

14. select what suits you \* ما طبيعة مدة عملك

Mark only one oval.

- Full time وقت كامل
- Half time نصف الوقت

15. Working hours/day \* ما عدد ساعات العمل في اليوم الواحد

Mark only one oval.

- less than 8 hours اقل من 8 ساعات
- 8 hours مدة العمل 8 ساعات
- more than 8 hours اكثر من 8 ساعات

16. Have you worked in a COVID-19 isolation Hospital or a healthcare receiving suspected COVID-19 patients? هل عملت في اى من مستشفيات العزل الخاصة بالكوفيد-19 او بمستشفى تستقبل حالات اشتباه كوفيد-19 \*

Mark only one oval.

- yes نعم
- no لا

17. if yes, mention the duration (days) ما عدد ايام عملك بمستشفى العزل

\_\_\_\_\_

18. Working hours/day in COVID-19 isolation hospital \* ما عدد ساعات العمل في مستشفى عزل كوفيد-19 في اليوم الواحد

Mark only one oval.

- less than 8 hours اقل من 8 ساعات
- 8 hours مدة العمل 8 ساعات
- more than 8 hours اكثر من 8 ساعات

Infection control measures during COVID-19 pandemic اجراءات الوقاية من العدوى اثناء جائحة الكوفيد-19

19. What are the most successful infection control measures against COVID-19 at your workplace? (Check all that apply). \* ما أكثر إجراءات مكافحة العدوى نجاحا داخل مكان عملك - اختر كل ما تراه مناسباً من الإجراءات التالية.

Check all that apply.

- Policies & procedures وجود سياسات وإجراءات واضحة لمكافحة العدوى
- Active infection control team فريق مكافحة عدوى نشط
- Triage فرز المرضى
- Restricted area for COVID-19 patients منطقة محددة لعزل مرضى الكوفيد 19
- Patients adhere to wearing masks يلتزم المرضى بارتداء أقنعة
- Availability of PPE supplies توافر معدات الوقاية الشخصية
- Good quality PPE معدات الوقاية الشخصية ذات نوعية جيدة
- Availability of hand hygiene supplies توافر مستلزمات نظافة اليدين
- Well-equipped isolation wards/rooms عنابر /غرف عزل مجهزة تجهيزاً جيداً
- Infection control training program برامج التدريب على إجراءات مكافحة العدوى
- Negative pressure room for aerosol generating procedures غرفة ضغط سلبية للإجراءات المنتجة للراذاد
- None لا يوجد
- Other إجراءات أخرى

20. Other infection control measures في حالة وجود إجراءات أخرى لم تذكر في القائمة السابقة...من فضلك أذكرها

---



---



---



---



---

21. Select the suitable for you \* اختر ما يتلائم معك

Mark only one oval per row.

|                                                                                                                                                                     | Yes نعم               | No لا                 |
|---------------------------------------------------------------------------------------------------------------------------------------------------------------------|-----------------------|-----------------------|
| Were you trained to properly apply hand hygiene? هل تم تدريبك على تطبيق نظافة اليدين بشكل صحيح؟                                                                     | <input type="radio"/> | <input type="radio"/> |
| Do you apply hand hygiene in a proper way and according to WHO 5 moments? هل تلتزم بتطهير الأيدي بطريقة سليمة تبعاً لمنظمة الصحة العالمية واتباع الخمس لحظات الهامة | <input type="radio"/> | <input type="radio"/> |
| Were you trained to properly select and use PPE? هل تم تدريبك على اختيار معدات الوقاية الشخصية واستخدامها بشكل صحيح؟                                                | <input type="radio"/> | <input type="radio"/> |
| Do you use PPE in a proper way? هل تستخدم معدات الوقاية الشخصية بطريقة مناسبة                                                                                       | <input type="radio"/> | <input type="radio"/> |

22. Who observes you while performing hand hygiene, donning and doffing PPE - check all that apply من كان يتابعك استخدامك لتطهير الأيدي و استخدام الواقيات الشخصية- اختر كل ما يناسبك

Check all that apply.

- Infection control officer مسئول مكافحة العدوى  
 Quality officer مسئول الجودة  
 A colleague احد الزملاء  
 A senior/supervisor زميل اكبر منى او رئيسى فى العمل  
 Myself انا  
 None لا يتابعنى احد

23. How often do you use single use gloves for one patient واحد معدل استخدامك القفاز ذو الاستخدام الواحد لمريض واحد \*

Mark only one oval.

- Always, as recommended دائماً على النحو الموصى به  
 Mostly معظم الوقت  
 Occasionally من حين لآخر  
 Rarely نادراً

24. How often do you use medical/ surgical mask الجراحي / الطبي ما معدل استخدامك القناع الطبي \*

Mark only one oval.

- Always, as recommended دائماً على النحو الموصى به  
 Mostly معظم الوقت  
 Occasionally من حين لآخر  
 Rarely نادراً

25. How often do you use face shield or goggles/protective glasses واقية نظارات واقية \* ما معدل استخدامك واقى الوجه / نظارات واقية

Mark only one oval.

- Always, as recommended دائماً على النحو الموصى به  
 Mostly معظم الوقت  
 Occasionally من حين لآخر  
 Rarely نادراً

26. Did you experience any shortage in PPE supplies during the pandemic? هل هناك نقص فى الارضية الواقية? \*

Mark only one oval.

- Yes نعم  
 No لا

27. If yes, which type (في حالة وجود نقص في كميات الأردية الواقية..من فضلك حدد النوع ( يمكنك اختيار أكثر من صنف

Check all that apply.

- Gloves القفازات ذات الاستخدام الواحد
- Gowns الجاونتات
- N95 respirator ماسك N95
- Surgical masks الماسك الجراحي
- Goggles/face shield نظارات/واقى الوجه

28. Did you have to extend the use of PPE because of its shortage? هل استخدمت الارديية الواقية لمدة اطول من المعتاد بسبب نقص \* هذه الارديية

Mark only one oval.

- Yes نعم
- No لا

29. If yes, which type (اذا كنت استخدمت الارديية الواقية لمدة اطول من المعتاد..من فضلك حدد النوع ( يمكنك اختيار أكثر من صنف

Check all that apply.

- Gloves القفازات ذات الاستخدام الواحد
- Disposable gowns الجاونتات احادية الاستخدام
- N95 respirator ماسك N95
- Surgical masks الماسك الجراحي
- Goggles/face shield نظارات/واقى الوجه

30. How often do you use disposable gown \* ما معدل استخدامك للجاون احادي الاستخدام

Mark only one oval.

- Always, for one patient دائما لمريض واحد
- For 12 hours لمدة 12 ساعة
- For 24 hours لمدة 24 ساعة
- For 1-3 days لمدة 1-3 أيام
- Rarely نادرًا

31. How often do you use Coverall \* ما معدل استخدامك بدلة واقية كاملة

Mark only one oval.

- Always, for one patient دائما لمريض واحد
- For 12 hours لمدة 12 ساعة
- For 1-3 days لمدة 1-3 أيام
- Rarely نادرًا



32. Do you re-sterilize N95 respirator \*هل تعيد تعقيم ماسكات N95

Mark only one oval.

Yes نعم

No لا

Dealing with Covid-19 patient 19 التعامل مع مريض مصاب بالكوفيد

33. Have you dealt with a COVID-19 patient? \*هل تعاملت مع مريض مصاب بالكوفيد؟

Mark only one oval.

Yes نعم Skip to question 34

No لا Skip to question 37

Untitled Section

## 34. Select what matches you in the following situations \* اختر ما حدث معك في كل موقف من المواقف التالية

Mark only one oval per row.

|                                                                                                                                                                                                                                                                                                                                                                                                                 | yes نعم               | no لا                 |
|-----------------------------------------------------------------------------------------------------------------------------------------------------------------------------------------------------------------------------------------------------------------------------------------------------------------------------------------------------------------------------------------------------------------|-----------------------|-----------------------|
| 1- Was there a direct skin-to-skin exposure to a COVID-19 patient? عندما تعاملت مع الحالة هل حدث تلامس مباشر بين جلدك وجلد المريض                                                                                                                                                                                                                                                                               | <input type="radio"/> | <input type="radio"/> |
| 2- Were you within one meter of a COVID-19 patient while not wearing appropriate PPE or had issues with your PPE (e.g., tears, removed while in patient area)? هل كنت موجوداً على مسافة متر من المصاب دون ان ترتدي اي واقيات شخصية او ارتديتها وحدث بها ثقب او تلف او تم خلعها وانت داخل منطقة رعاية المريض                                                                                                     | <input type="radio"/> | <input type="radio"/> |
| 3- Did you have a direct contact with environment (e.g., bed, linens, medical equipment, frequently touched surfaces, bathroom) where the patient received care هل تعاملت تعامل مباشر مع البيئة المحيطة بالمريض مثل (الملايات- الحمامات- الاجهزة الطبية)                                                                                                                                                        | <input type="radio"/> | <input type="radio"/> |
| 4- Did you provide direct care to a confirmed COVID-19 patient while not wearing appropriate personal protective equipment (PPE) or had issues with your PPE (e.g., tears, removed while in patient area)? هل قدمت خدمة طبية مباشرة للمصاب دون ان ترتدي اي واقيات شخصية او ارتديتها وحدث بها ثقب او تلف او تم خلعها وانت داخل منطقة رعاية المريض                                                                | <input type="radio"/> | <input type="radio"/> |
| 6- Did you fail to perform hand hygiene after providing a direct patient care هل فشلت في القيام بغسيل الايدي الصحي بعد تقديم الرعاية للمريض                                                                                                                                                                                                                                                                     | <input type="radio"/> | <input type="radio"/> |
| 6- Did you fail to perform hand hygiene after having direct contact with the environment where a COVID-19 patient received care هل فشلت في القيام بغسيل الايدي الصحي بعد لمس البيئة المحيطة بالمريض                                                                                                                                                                                                             | <input type="radio"/> | <input type="radio"/> |
| 7- Did you fail to perform hand hygiene after removing your PPE هل فشلت في القيام بغسيل الايدي الصحي بعد خلع الواقيات الشخصية                                                                                                                                                                                                                                                                                   | <input type="radio"/> | <input type="radio"/> |
| 8- Did you perform or assist or attend with any aerosol-generating procedure (AGP) on a COVID-19 patient, without wearing appropriate personal protective equipment (PPE)? Or had issues with my PPE (e.g., torn PPE or removed while in patient area)? هل قمت بعمل او بالمساعدة او الحضور اثناء اجراء للمصاب كان به تناثر للرداؤ دون ارتداء الواقيات الشخصية او كانت ممزقة او تم خلعها داخل منطقة رعاية المريض | <input type="radio"/> | <input type="radio"/> |
| 9- Did you handle body fluid or other specimens from the patient without wearing appropriate PPE? Or had issues with your PPE (e.g., torn PPE or removed while in patient area)? هل تعاملت مع افرازات او عينات المريض دون ارتداء الواقيات الشخصية او كانت ممزقة او تم خلعها داخل منطقة رعاية المريض                                                                                                             | <input type="radio"/> | <input type="radio"/> |
| 10- Did you have direct exposure (to your skin or mucous membrane) to a COVID-19 patient's respiratory secretions or bodily                                                                                                                                                                                                                                                                                     | <input type="radio"/> | <input type="radio"/> |

هل تعاملت مع الحالة وحدث تلامس مباشر بين جلدك fluid? او اغشيتك المخاطية مع اى من سوائل الجسم او الافرازات التنفسية للمريض

11- Did you have a percutaneous exposure (e.g., needle stick, cut, puncture) with material potentially contaminated with body fluid, blood, or respiratory secretions. هل تعاملت مع الحالة وحدث اختراق او قطع لجلدك مع تلامس لمادة ملوثة بدم او سوائل الجسم او الافرازات التنفسية للمريض

 

35. If you attend/perform any aerosol generating procedures, what type is it? اذا كنت قمت باجراء او تواجدت اثناء اجراء احد الاجراءات المنتجة للرداذ؟ حدد هذا الاجراء من القائمة التالية وفي حالة وجود اكثر من اجراء اذكرهم جميعا

Check all that apply.

- Tracheal intubation تركيب انبوبة حنجرية
- Nebulizer treatment (علاج بالاستنشاق) (نيوبلايزر)
- Open airway suctioning تشفيط
- Collection of sputum تجميع بصاق
- Tracheotomy شق حنجري
- Bronchoscopy ميكروسكوب شعبي
- Cardiopulmonary resuscitation (CPR) (انعاش قلبي رئوي)
- Throat examination in pediatrics فحص الحلق في حالات الاطفال
- Nasopharyngeal swab collection سحب مسحة من الحلق
- Others اجراءات اخرى

36. Other aerosol generating procedures في حالة وجود اجراءات اخرى لم تذكر في القائمة السابقة...من فضلك أذكرها

---



---



---



---



---

#### Untitled Section

37. Did you get infected with COVID-19? هل تعرضت للاصابة بمرض الكوفيد-19? \*

Mark only one oval.

- Yes نعم
- No لا

#### COVID-19 infection خصائص الاصابة بمرض الكوفيد-19

38. When did you get infected? متى تعرضت للاصابة؟ \*

Mark only one oval.

- I was on duty وأنا على قوة العمل
- I was not on duty لم اكن على قوة العمل

39. What was the source of your COVID-19 infection من هو مصدر العدوي \*  
 \* من هو مصدر العدوي

Mark only one oval.

- From a COVID-19 household contact احد المخالطين بالمنزل كان مصابا بالكوفيد
- From a COVID-19 patient at work مريض كوفيد في مكان العمل
- From a colleague من احد الزملاء في مكان العمل
- Uncertain لا استطيع تحديده
- Others اخرون

40. Was the source of infection symptomatic? هل كان مصدر العدوي يشكو من اي اعراض؟

Mark only one oval.

- Yes نعم
- No لا

41. Where did the exposure to COVID-19 patients occur? - check all that apply. - حدد مكان اصابتك بالعدوي داخل مكان عملك -

\* اختر كل ما تراه مناسب من الأماكن التالية

Check all that apply.

- Cleaning services خدمات النظافة
- Emergency room غرفة الطوارئ
- Inpatient ward الاقسام الداخلية
- Intensive care Unit وحدة الرعاية المركزة
- Laboratory المعمل
- Outpatient area العيادات الخارجية
- Operating room غرفة العمليات
- Pharmacy صيدلية
- Radiology/imaging الاشعه
- Reception area الاستقبال
- Transport اثناء نقل المريض
- Triage مكان الفرز
- Administrative offices مكاتب ادارية
- On call rooms السكن
- Unknown لا اعلم
- Other أخرى

42. Other site في حالة وجود مكان اصابة آخر لم يذكر في القائمة السابقة...من فضلك أذكره

---

43. How were you diagnosed as COVID-19 positive (Select all that applies) - كيف تم تشخيص اصابتك بمرض الكوفيد - اختر كل 19-

\* ما تراه مناسب في طرق التشخيص التالية

Check all that apply.

- Clinical بالفحص الاكلينيكي
- CT chest بالاشعة المقطعية
- Serology تحليل الدم السيرولوجي
- PCR اختبار البي سي ار

44. Your COVID-19 symptoms \* ما هي اعراض الكوفيد-19 التي ظهرت عليك

Mark only one oval.

- Asymptomatic لم تظهر اعراض
- Mild اعراض بسيطة
- Moderate اعراض متوسطة
- Severe اعراض شديدة

45. Where have you been isolated \* ما هو مكان العزل

Mark only one oval.

- At home عزل منزلي
- Admitted to hospital داخل مستشفى
- Admitted to a COVID-19 isolation hospital داخل مستشفى عزل

46. Your clinical outcome \* ما هو وضع الحالة اكلينيكيًا

Mark only one oval.

- Recoverd تماثلت للشفاء
- Complicated حدوث مضاعفات
- Under treatment مازلت تحت العلاج

---

This content is neither created nor endorsed by Google.

Google Forms
